# Supplementary material
Source: Springer Nature journal article supplement (https://www.springermedizin.de/resource/supplementary/12939_2010_190_MOESM1_ESM.pdf/9550562)
Supplement: MOESM1 [file 9550562]

Enrolled women =891  
8 (did not complete the first interview and record review)

COMPLETED INTERVIEWS

|                          |             |
|--------------------------|-------------|
| 3 WEEK INTERVIEW (n=786) |             |
| HIV + = 665              | HIV - = 218 |

|                           |            |
|---------------------------|------------|
| 24 WEEK INTERVIEW (n=650) |            |
| HIV + =481                | HIV - =169 |

|                           |            |
|---------------------------|------------|
| 36 WEEK INTERVIEW (n=626) |            |
| HIV + =458                | HIV + =168 |

MISSING DATA

3 WEEK INTERVIEW (n=97)

|                                        |                                       |
|----------------------------------------|---------------------------------------|
| HIV + = Child mortality (<9 months) 17 | HIV - = Child mortality (<9 months) 1 |
| Loss/withdrawal=60                     | Loss/withdrawal=19                    |

24 WEEK INTERVIEW (n=136)

|                                        |                                    |
|----------------------------------------|------------------------------------|
| HIV + = Child mortality (<9 months) 37 | HIV-=Child mortality (<9 months) 6 |
| Loss/withdrawal=70                     | Loss/withdrawal=23                 |

36 WEEK INTERVIEW (n=24)

|                                        |                               |
|----------------------------------------|-------------------------------|
| HIV + = Child mortality (<9 months) 13 | Child mortality (<9 months) 1 |
| Loss/withdrawal=10                     |                               |
